# Supplementary material for: Incidence of Syncope During Pregnancy: Temporal Trends and Outcomes
Source: PubMed Central journal article supplement — J Am Heart Assoc. 2019 May 15;8(10):e011608. doi: 10.1161/JAHA.118.011608 (PMC6585338; doi:10.1161/jaha.118.011608), 2019-05-15
Supplement: JAH3-8-e011608-s001.pdf [file JAH3-8-e011608-s001.pdf]

# **SUPPLEMENTAL MATERIAL**

## **Data S1.**

### **Supplemental Analysis**

Due to the longitudinal nature of the pregnancy-birth cohort, there were 130,317 women who had more than one pregnancy during the study time period. In addition, there were 8161 pregnancies that resulted in multiple births and 55 women had more than one multiple birth pregnancy in our study.

To account for correlations across pregnancies, we conducted supplementary analyses using generalized estimating equation (GEE) models with binomial distribution and logit function to examine the association between syncope during pregnancy and neonatal and congenital anomaly outcomes in the offspring.

The GEE model accounts for multiple pregnancies from the same mother. However, a pregnancy that resulted in multiple births is counted only once. In the latter case, if any of the neonates born from the multiple pregnancy (i.e. twins, triplets) developed the outcome of interest, that pregnancy was considered to have the outcome.

For each outcome of interest three separate GEE models, including maternal age at delivery as a covariate in the model, were executed: model 1 compared no syncope vs. syncope; model 2 compared no syncope vs. syncope during first, second and third trimester and model 3 compared no syncope vs. 1 syncope episode and >1 syncope episode. Results are presented in Figure S2.

**Table S1. ICD codes for pre-existing medical conditions and congenital anomalies.**

| <b>Conditions</b>                                                                                                                    | <b>ICD codes 9<sup>th</sup> revision</b>                                                                    | <b>ICD codes 10<sup>th</sup> revision</b>                                                     |
|--------------------------------------------------------------------------------------------------------------------------------------|-------------------------------------------------------------------------------------------------------------|-----------------------------------------------------------------------------------------------|
| Pre-existing diabetes mellitus                                                                                                       | 648.0, 250                                                                                                  | O240-O243, O245-O247,<br>O249, E10-E14                                                        |
| Gestational diabetes mellitus                                                                                                        | 648.8                                                                                                       | O24.8                                                                                         |
| Hypertensive disorders of pregnancy (including pre-eclampsia, eclampsia, and pregnancy-induced edema, proteinuria, and hypertension) | 642.3-7                                                                                                     | O13, O14, O15                                                                                 |
| <b>Cardiovascular and circulatory conditions</b>                                                                                     |                                                                                                             |                                                                                               |
| Congestive heart failure                                                                                                             | 398.91, 402.01, 402.11,<br>402.91, 404.01, 404.03,<br>404.11, 404.13, 404.91, 425.4,<br>425.5, 425.7-9, 428 | I09.9, I11.0, I13.0, I13.2,<br>I25.5, I42.0, I42.5-9, I43, I50                                |
| Cardiac arrhythmia                                                                                                                   | 426.0, 426.13, 426.7, 426.9,<br>426.10, 426.12, 427.0-4,<br>427.6, 427.8-9, 785.0, 996.01,<br>996.04,       | I44.1-3, 145.6, I45.9, I47, I49,<br>R00.0, R00.1, R00.8, T82.1,<br>Z45.0, Z95.0, V45.0, V53.3 |
| Valvular heart disease                                                                                                               | 394, -397, 424, 746.3, 746.4,<br>746.5, 746.6                                                               | A52.0, I05-I08, I09.1, I09.8,<br>I34-I39, Q23.0-3, Z95.2-4,<br>O93.2, V42.2, V43.3            |
| Ischemic heart disease                                                                                                               | 410, 412, 413, 414, 429.2                                                                                   | I20-I25                                                                                       |

|                                               |                                                              |                                                                                                        |
|-----------------------------------------------|--------------------------------------------------------------|--------------------------------------------------------------------------------------------------------|
| Hypertension                                  | 401-405                                                      | I10-I13, I15                                                                                           |
| Pulmonary circulation disorder                | 415.415.1, 416, 417.0, 417.8,<br>417.9                       | I26, I27, I28.0, I28.8, I28.9                                                                          |
| Peripheral vascular disease                   | 440, 441, 443.1, 443.2, 443.8,<br>443.9, 447.1, 557.1, 557.9 | I70, I71, I73.1, I73.8, I77.1,<br>I79.0, I79.2, K55.1, K55.8,<br>K55.9, O93.0, V43.4, Z95.8,<br>Z95.9, |
| <b>Congenital anomalies</b>                   |                                                              |                                                                                                        |
| Anencephaly/acrania                           | 740                                                          | Q00.0                                                                                                  |
| Transposition of great vessels                | 745.1X                                                       | Q20.1, Q20.3, Q20.5, Q20.8                                                                             |
| Hypoplastic left heart syndrome               | 746.7                                                        | Q23.04                                                                                                 |
| Renal agenesis and dysgenesis                 | 753                                                          | Q60.2, Q60.5                                                                                           |
| Anomalies of diaphragm                        | 756.6                                                        |                                                                                                        |
| Patau syndrome                                | 758.1                                                        | Q91.7                                                                                                  |
| Edward syndrome                               | 758.2                                                        | Q91.3                                                                                                  |
| Tetralogy of Fallot                           | 745.2                                                        | Q21.3                                                                                                  |
| Common ventricle                              | 745.3                                                        | Q20.4                                                                                                  |
| Endocardial cushion defects                   | 745.6X                                                       | Q21.2                                                                                                  |
| Congenital anomalies of pulmonary valve       | 746.0X                                                       | Q22.0-Q22.3                                                                                            |
| Other specified congenital anomalies of heart | 746.8X                                                       | Q24.0-Q24.8                                                                                            |
| Patent ductus arteriosus                      | 747                                                          | Q25.0                                                                                                  |

|                                                                 |               |                                      |
|-----------------------------------------------------------------|---------------|--------------------------------------|
| Coarctation of aorta                                            | 747.1         | Q25.1                                |
| Anomalies of pulmonary artery                                   | 747.3         | Q25.5, Q25.6, Q25.71, Q25.72, Q25.79 |
| Agenesis, hypoplasia, and dysplasia of lung                     | 748.5         | Q33.2 Q33.3, Q33.6                   |
| Tracheoesophageal fistula, esophageal fistula and stenosis      | 750.3         | Q39.0-Q39.4                          |
| Atresia and stenosis of small intestine                         | 751.1         | Q41.9                                |
| Atresia and stenosis of large intestine, rectum, and anal canal | 751.2         | Q42.9                                |
| Congenital single renal cyst                                    | 753.11        | Q61.01                               |
| Polycystic kidney                                               | 753.12-753.14 | Q61.2, Q61.3, Q61.19                 |
| Renal dysplasia                                                 | 753.15        | Q61.4                                |
| Other specified cystic kidney disease                           | 753.19        | Q61.8                                |
| Anomalies of abdominal wall                                     | 756.7         | Q79.2-Q79.4, Q79.51, Q79.59          |
| Other conditions of autosomal anomalies                         | 758.5         | Q92.7                                |

ICD, International Classification Disease

**Figure S1. Flow diagram for study cohort selection.**

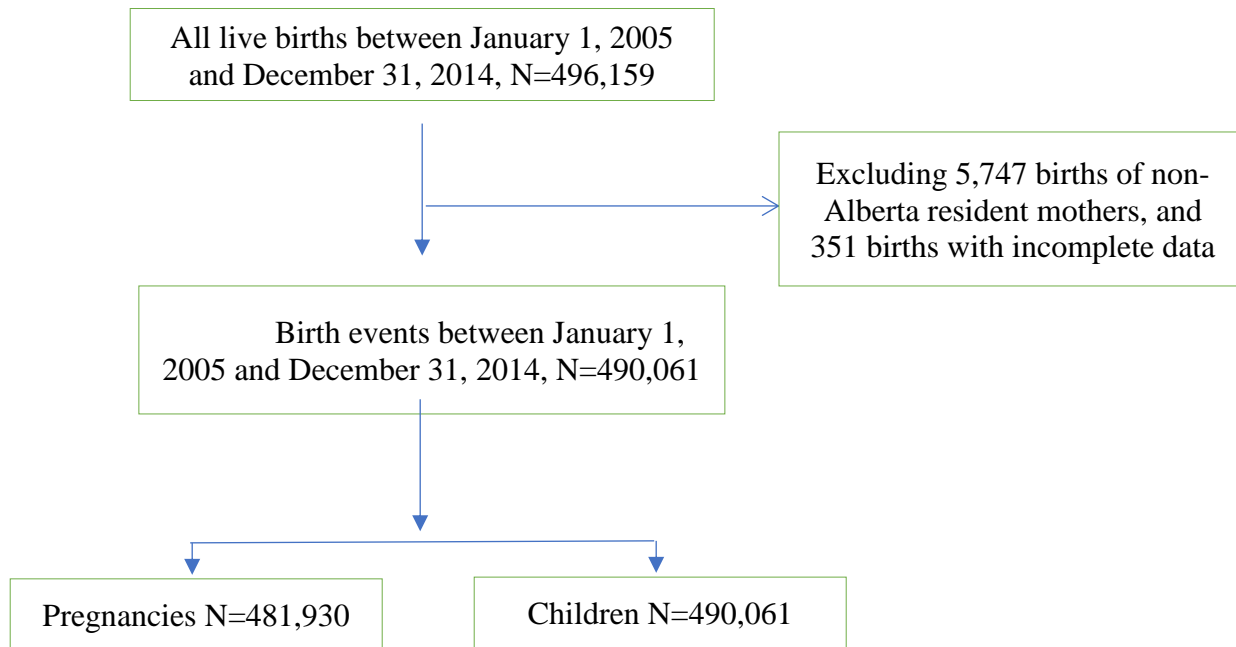

**Figure S2. Maternal age adjusted odds ratios and 95% confidence intervals for the association of syncope and neonatal/congenital anomaly outcomes based on generalized estimating equation models accounting for correlation between pregnancies/births of the same mother.**

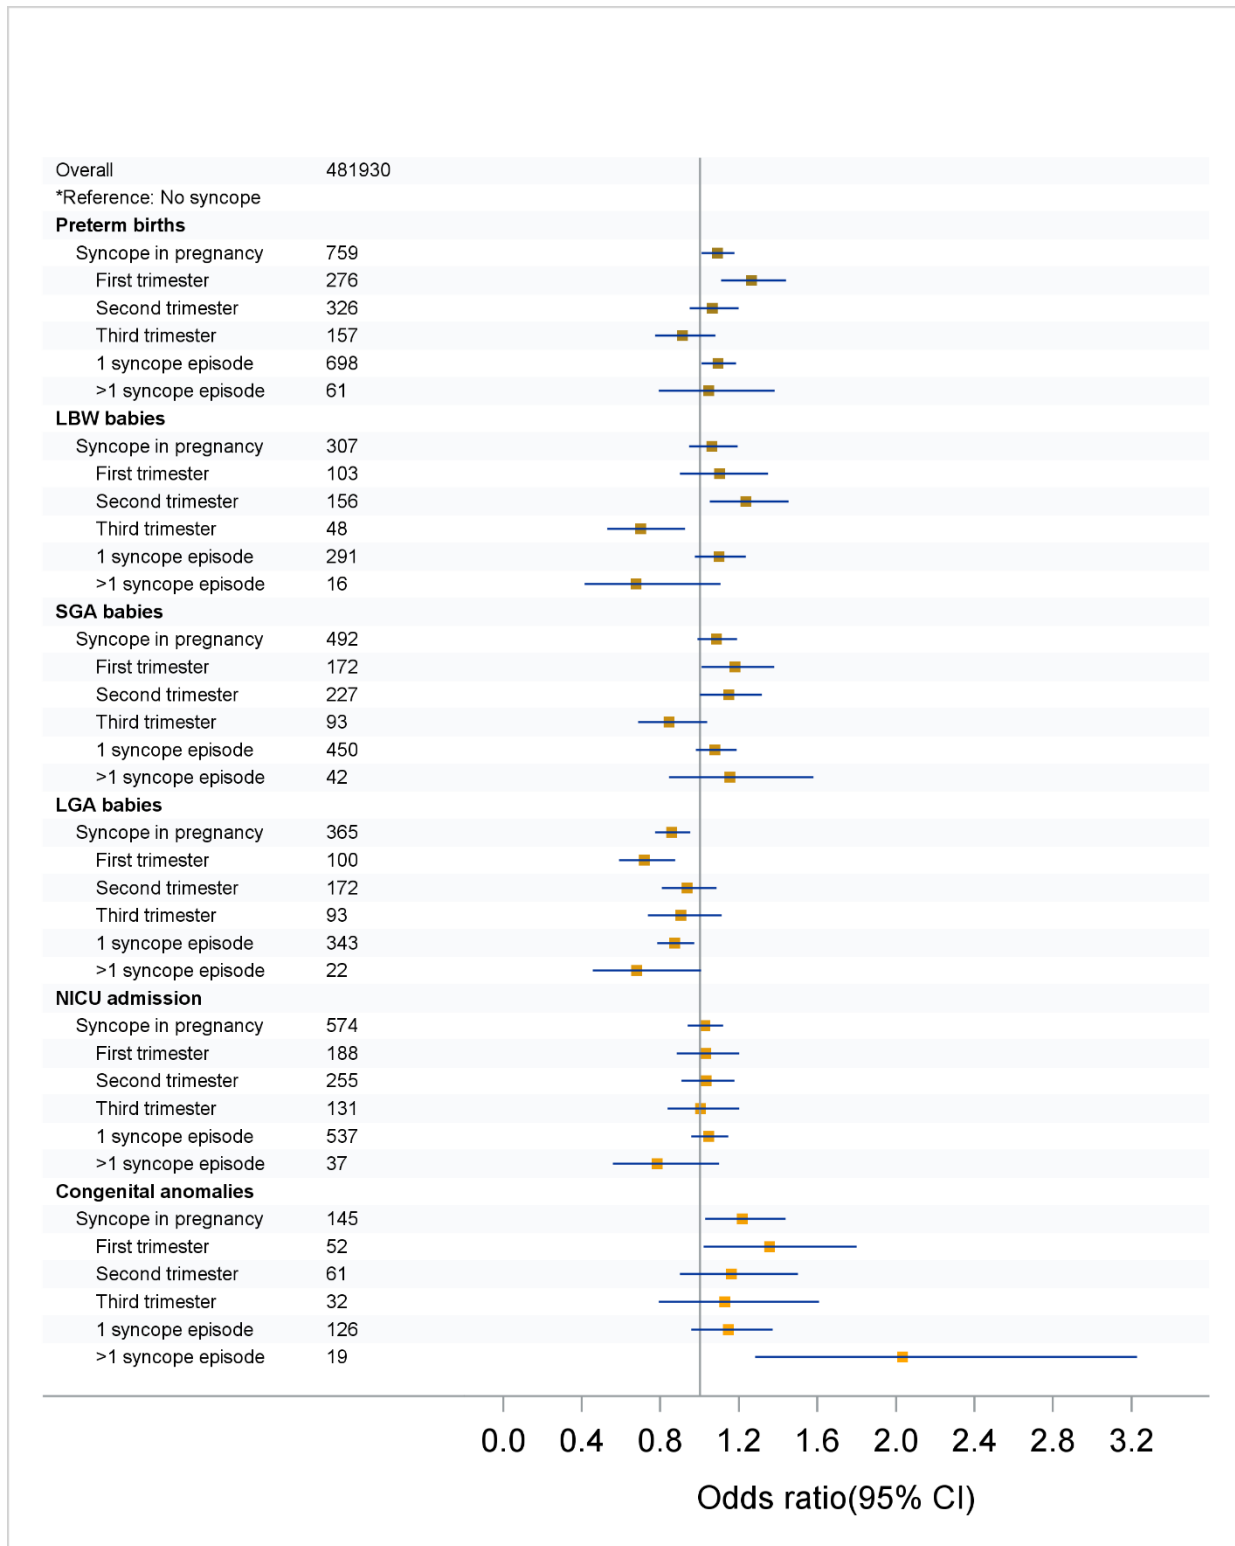

LBW: low birth weight; SGA: small for gestational age; LGA: large for gestational age; NICU: neonatal intensive care unit; CI: confidence interval.
